# Supplementary material for: Improvement of Hydrodynamics-Based Gene Transfer of Nonviral DNA Targeted to Murine Hepatocytes
Source: PubMed Central journal article supplement (PMC3613052; doi:10.1155/2013/928790), 2013-03-17
Supplement: 928790.f1.pdf [file 928790.f1.pdf]

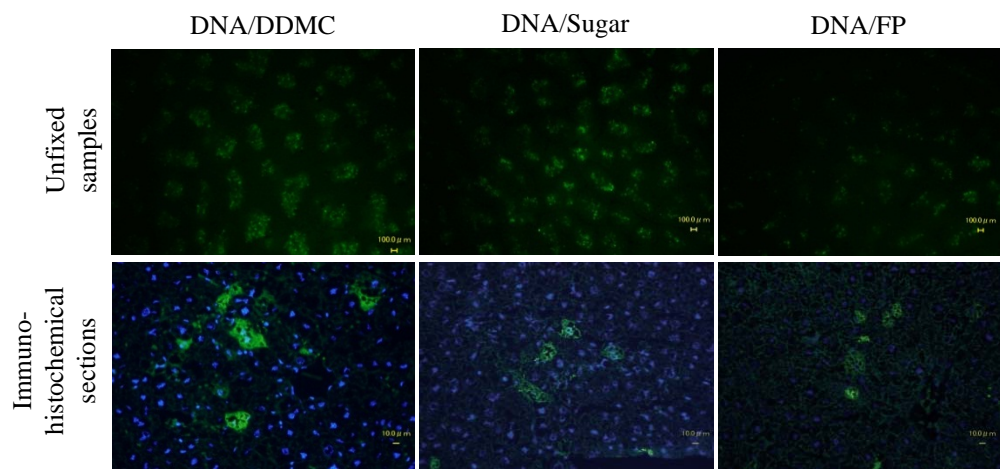

Supplementary Fig. 1D
